# Supplementary material for: Distinct roles of temporal and frontoparietal cortex in representing actions across vision and language
Source: PubMed Central journal article supplement (PMC6336825; doi:10.1038/s41467-018-08084-y), 2019-01-17
Supplement: 41467_2018_8084_MOESM1_ESM.pdf [file 41467_2018_8084_MOESM1_ESM.pdf]

**Distinct roles of temporal and frontoparietal cortex in representing actions  
across vision and language**

Wurm & Caramazza

**Supplementary Information**

## Supplementary Notes

**Behavioral performance.** During fMRI, participants performed a catch trial detection task. In both the video and sentence session, they detected incorrect actions with good accuracy (sentences:  $83\% \pm 2.2$  SEM, videos:  $80\% \pm 2.9$  SEM). The rate of false alarms was low for all 8 actions (sentences:  $0.9\% \pm 0.3$  SEM, videos:  $1.5\% \pm 0.6$  SEM) and uncorrelated between the two sessions ( $r(6) = -0.32$ ,  $p = 0.44$ ) suggesting that there were no action-specific similarities in task difficulty/confusability across sessions. A similar result was obtained in the behavioral control experiment, in which participants performed a 2-alternative forced choice task (Supplementary Table 1).

The Post-fMRI ratings for verbalization and visual action imagery revealed, irrespective of session order, no strong tendencies to verbalize during the video session (mean ratings; sentence first:  $3.9 \pm 0.5$  SEM, video first:  $2.7 \pm 0.6$  SEM; on a Likert scale from 1 to 6) and to imagine the actions during the sentence session (sentence first:  $3.1 \pm 0.4$  SEM, video first:  $3.8 \pm 0.5$  SEM; mixed ANOVA interaction:  $F(1,19) = 3.71$ ,  $p = 0.07$ ). However, the correspondence between verbalized actions and sentences during watching the action videos was stronger when the experiment started with the sentence session as compared to starting with the video session. Likewise, the correspondence between imagined actions and actions shown in the videos was higher when the experiment started with the video session as compared to starting with the sentence session (mixed ANOVA interaction:  $F(1,19) = 11.31$ ,  $p = 0.003$ ). The responses to verbalization/imagery ratings and correspondence ratings correlated with each other, i.e., high verbalization ratings were accompanied by high verbalization-sentence correspondence ratings ( $r(19) = 0.45$ ,  $p = 0.035$ ), and high imagery ratings were accompanied by high imagery-video correspondence ratings ( $r(19) = 0.57$ ,  $p = 0.009$ ). Together, these results suggests only weak tendencies to verbalize and to imagine the action across session; but if participants verbalized or imagined the actions, then the verbalized or imagined actions corresponded more strongly to the stimuli they recalled from the first session.

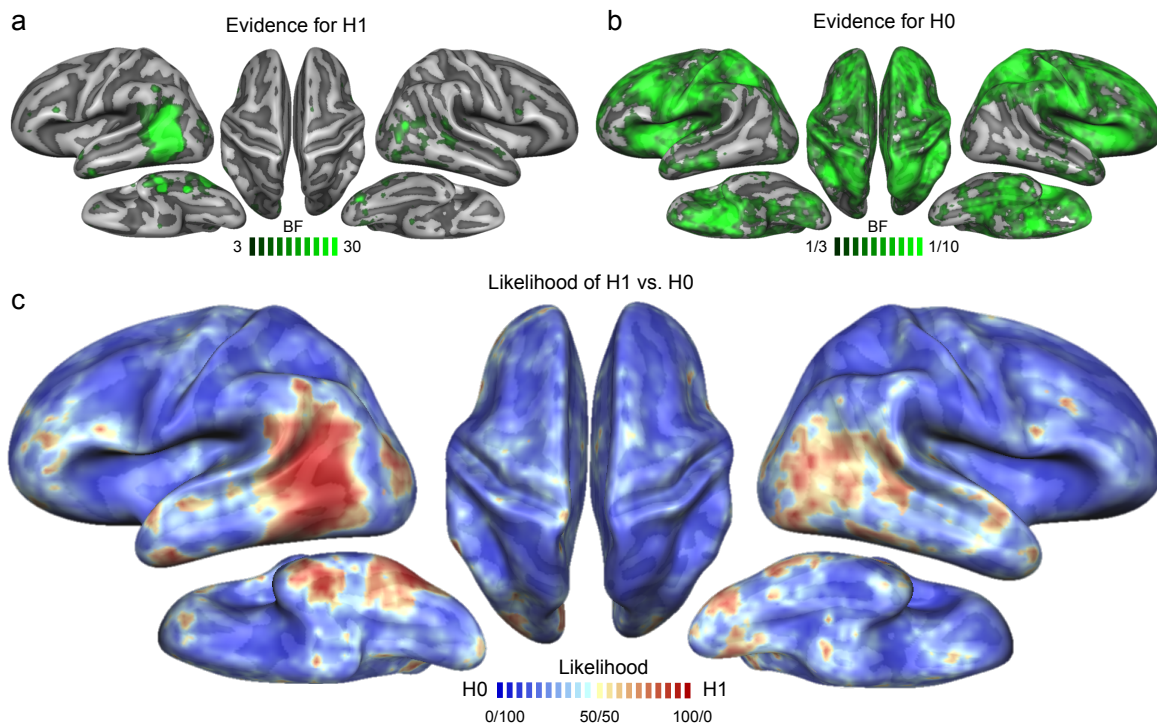

**Supplementary Figure 1.** Bayesian model comparison for crossmodal action decoding vs. chance. (a) Bayes factors ( $BF$ ) indicating evidence for  $H_1$ , i.e., the hypothesis that decoding accuracies are above chance. (b) Inverse Bayes factors indicating evidence for  $H_0$ , i.e., the null hypothesis that decoding accuracies are not above chance. Maps are thresholded at  $BF = 3$  and  $1/3$ , suggesting moderate evidence for  $H_1$  and  $H_0$ , respectively<sup>1</sup>. Different upper ends of scales for  $H_1$  (30 = very strong evidence) and  $H_0$  (10 = strong evidence) maps were chosen to account for asymmetries in ease to find evidence for  $H_1$  and  $H_0$ , respectively. (c) Likelihood map for  $H_1$  vs.  $H_0$  using a fixed scale  $(BF/(BF+1))*100$ . Note that the Bayesian model comparison does not provide statistical measures of significance but likelihoods for or against the tested hypothesis in the data. The general purpose of this analysis is to provide an estimate of whether the absence of crossmodal decoding is meaningful or could be due to a lack of power in the data. Note that the Bayes factor maps are not suited for multiple comparison correction. Therefore, Bayes factors  $> 3$  (and  $< 100$ ) in right LPTC and left ITG cannot be interpreted as conclusive positive evidence for crossmodal effects in these areas.

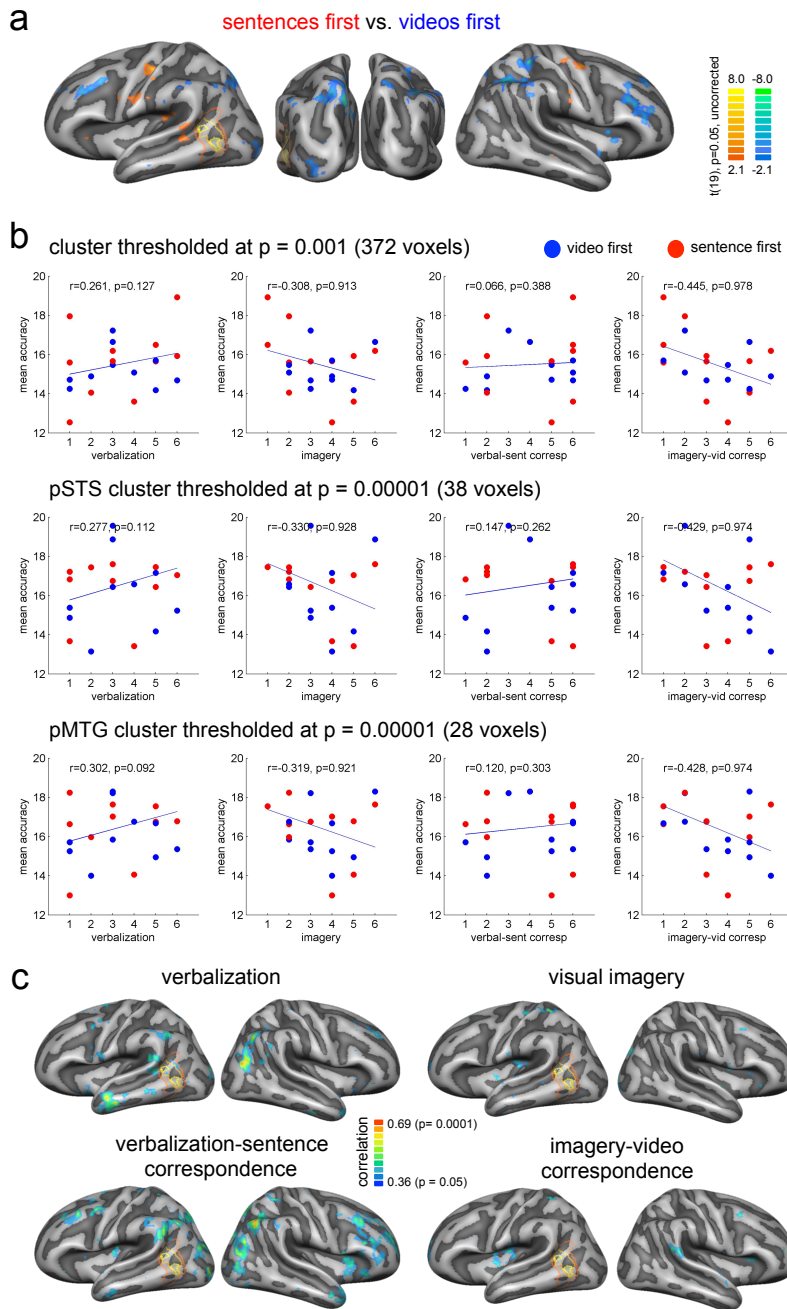

**Supplementary Figure 2.** Modulation of crossmodal decoding accuracies by verbalization and visual imagery. (a) Independent two-tailed t-test between decoding accuracies of the participant group with session order sentences-videos (sentence first) and the participant group with session order videos-sentences (video first). To reveal any trends of session order effects, maps were leniently thresholded and uncorrected. (b) Correlations between decoding accuracies and rating scores for verbalization, visual imagery, correspondence between verbalized actions and sentences, and correspondence between imagined actions and videos (see Methods for details). Decoding accuracies were averaged across voxels that showed significant crossmodal decoding. As the cluster of the crossmodal decoding was relatively large (372 voxels) it could be that a true effect emerging from a subset of voxels in the cluster was averaged out. We therefore tested whether reducing the ROI size by including only the most significant voxels ( $p < 0.0001$ ; 38 voxels in pMTG, 28 voxels in pSTS). Blue dots indicate participants of the “video first” group, red dots indicate participants of the “sentence first” group. (c) Whole brain maps of correlations between rating scores and crossmodal decoding accuracies. Outlines in a and c indicate the extent of the crossmodal action decoding cluster thresholded at  $p < 0.001$  (red),  $p < 0.0001$  (orange), and  $p < 0.00001$  (yellow).



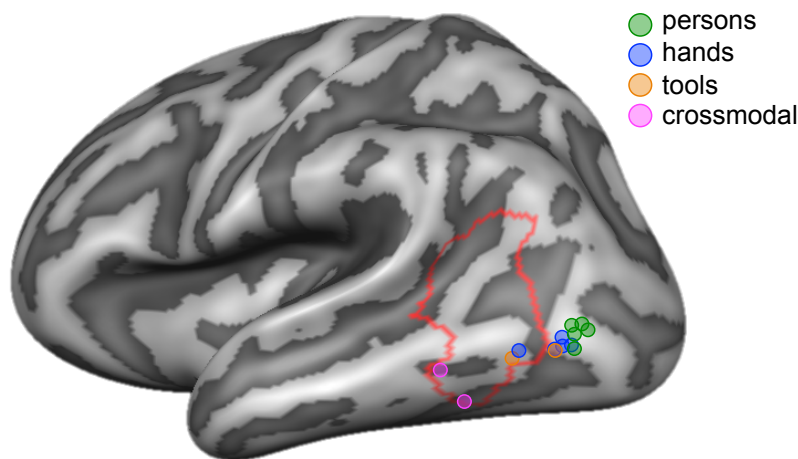

| Study                      | Contrast                                | Tal X | Tal Y | Tal Z |
|----------------------------|-----------------------------------------|-------|-------|-------|
| Bracci et al., 2012        | tools > animals (Study 1)               | -48   | -65   | -6    |
|                            | hands > animals (Study 1)               | -49   | -65   | -2    |
|                            | hands > chairs (Study 2)                | -46   | -68   | -2    |
|                            | tools > chairs (Study 2)                | -46   | -68   | -2    |
|                            | whole bodies > chairs (Study 2)         | -46   | -73   | -2    |
| Bracci & Peelen, 2013      | hands > whole bodies + chairs (Study 1) | -50   | -71   | -3    |
|                            | hands > whole bodies + chairs (Study 2) | -48   | -69   | 1     |
|                            | hands > whole bodies + chairs (Study 3) | -47   | -69   | 1     |
|                            | hands > whole bodies + chairs (Study 4) | -49   | -69   | -2    |
|                            | whole bodies > hands + chairs (Study 1) | -47   | -72   | 3     |
|                            | whole bodies > hands + chairs (Study 2) | -46   | -77   | 7     |
|                            | whole bodies > hands + chairs (Study 3) | -45   | -74   | 5     |
|                            | whole bodies > hands + chairs (Study 4) | -45   | -74   | 6     |
| Bracci et al., 2015        | whole bodies > chairs                   | -48   | -71   | 5     |
| Fairhall & Caramazza, 2013 | crossmodal MVPA                         | -50   | -48   | -7    |
| Simanova et al., 2012      | crossmodal MVPA                         | -43   | -52   | -7    |

**Supplementary Figure 3.** Peak locations of functional localizers for objects. Talairach coordinates were extracted from 3 studies that report univariate contrasts localizing object categories that broadly comprise the objects targeted in the present study (whole bodies: green, hands: blue, and tools: orange)<sup>2-4</sup>. Additional Talairach coordinates (converted from MNI coordinates) were extracted from 2 studies targeting modality-general representations of object categories using crossmodal MVPA (Fairhall & Caramazza, 2013: tools, fruit, clothes, mammals, and birds; Simanova et al., 2012: tools and animals)<sup>5,6</sup>. Peak locations do not substantially overlap with the cluster for crossmodal action decoding of the present study (red outline).

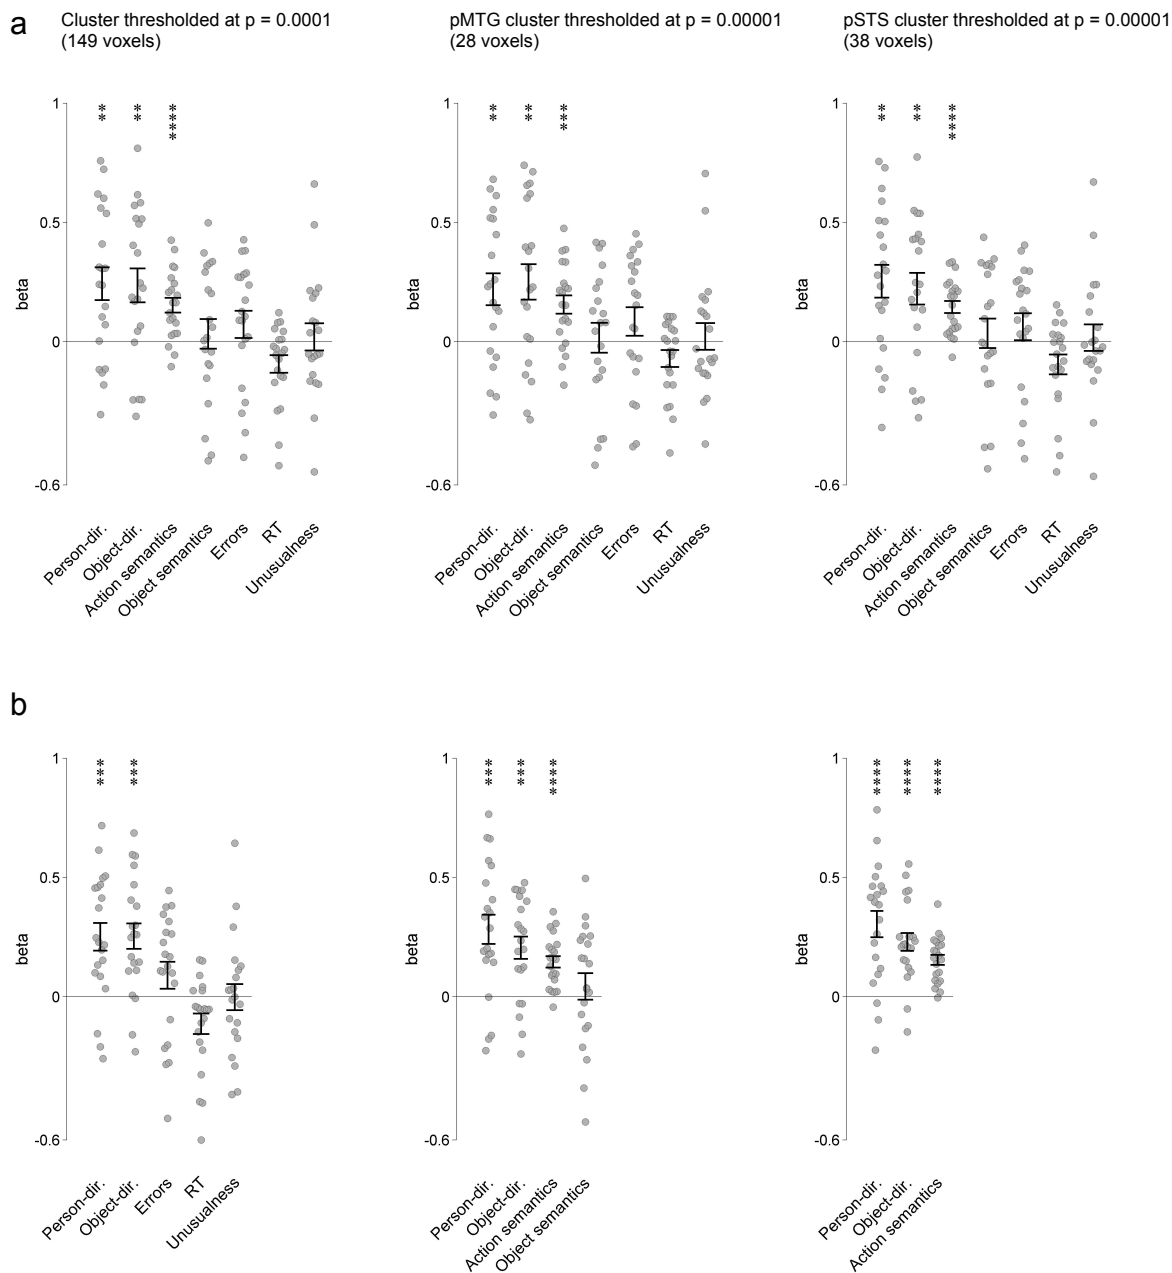

**Supplementary Figure 4.** Robustness of crossmodal multiple regression RSA effects across different ROI sizes (a) and models used in the multiple regression RSA (b). Asterisks indicate FDR-corrected effects: \*  $p < 0.05$ , \*\*  $p < 0.01$ , \*\*\*  $p = 0.001$ , \*\*\*\*  $p < 0.0001$ . Error bars/lines indicate SEM.

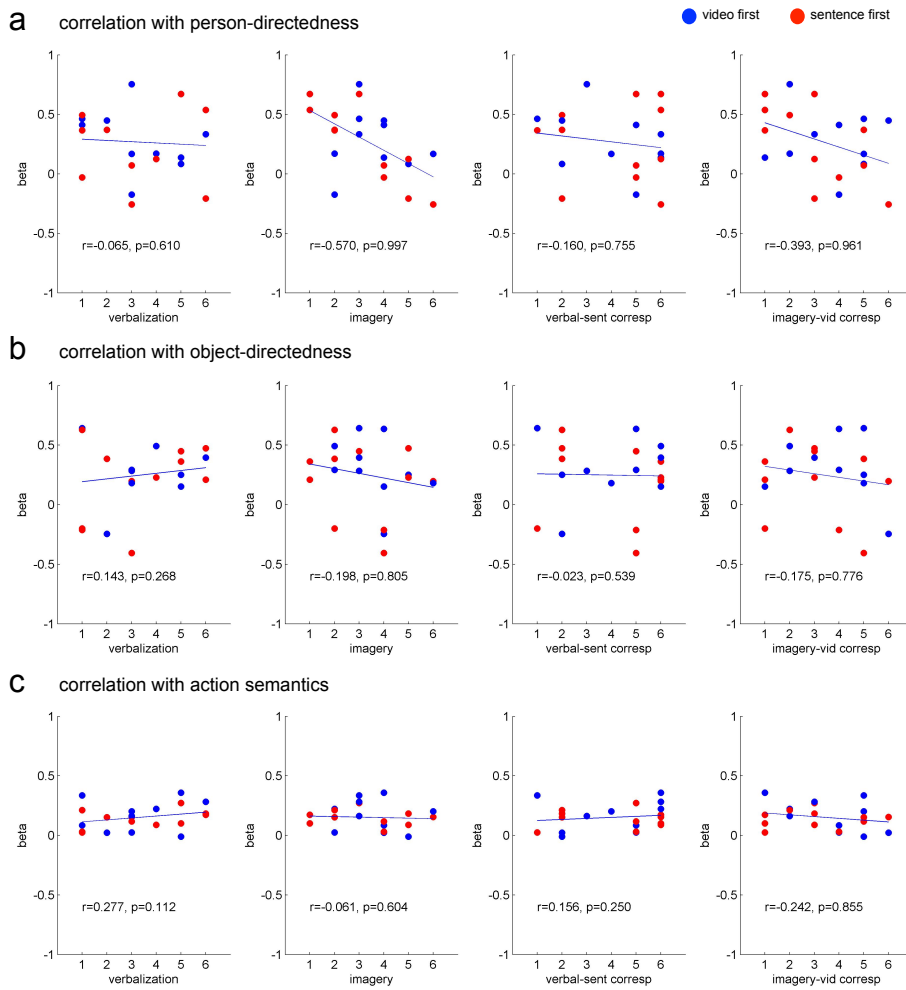

**Supplementary Figure 5.** Modulation of beta coefficients from the crossmodal multiple regression RSA (Fig. 3b) by verbalization and visual imagery. Betas for person-directedness (a), object-directedness (b), and action semantics (c) were correlated with rating scores for verbalization, visual imagery, correspondence between verbalized actions and sentences, and correspondence between imagined actions and videos (same procedures as reported for Supplementary Figure 2). We observed a trend for a negative correlation between person-directedness and imagery (when using a two-tailed test). However, this effect was not significant after FDR correction for the number of correlations, suggesting that the negative correlation was likely to arise by chance. We additionally tested for effects of session order by entering the betas for person-directedness, object-directedness, and action semantics into two-tailed independent *t*-tests comparing the video-first with the sentence-first group. No significant differences between groups were observed (all *ps* > 0.1).

**Supplementary Table 1.** Behavioral results of the fMRI experiment, the behavioral (two-alternatives forced choice) control experiment, and the rating (using Likert scales from 1 = not at all to 6 = very much; see Methods for details).

|                              | open  | close | give  | take  | stroke | scratch | agree | disagree | catch trials |
|------------------------------|-------|-------|-------|-------|--------|---------|-------|----------|--------------|
| <i>fMRI sentence session</i> |       |       |       |       |        |         |       |          |              |
| mean hit/CR rate             | 0.990 | 0.992 | 0.973 | 0.999 | 0.992  | 0.994   | 0.995 | 0.996    | 0.832        |
| SEM                          | 0.003 | 0.003 | 0.005 | 0.001 | 0.003  | 0.003   | 0.003 | 0.003    | 0.022        |
| <i>fMRI video session</i>    |       |       |       |       |        |         |       |          |              |
| mean hit/CR rate             | 0.988 | 0.981 | 0.998 | 0.991 | 0.959  | 0.987   | 0.993 | 0.978    | 0.805        |
| SEM                          | 0.003 | 0.008 | 0.001 | 0.004 | 0.016  | 0.006   | 0.004 | 0.012    | 0.029        |
| <i>2AFC sentence session</i> |       |       |       |       |        |         |       |          |              |
| mean accuracy                | 0.986 | 0.993 | 0.972 | 0.979 | 0.979  | 0.993   | 1.000 | 1.000    | 0.819        |
| SEM                          | 0.009 | 0.007 | 0.021 | 0.011 | 0.015  | 0.007   | 0.000 | 0.000    | 0.056        |
| mean RT                      | 1961  | 1968  | 2044  | 1963  | 1973   | 1954    | 1986  | 1972     | 2121         |
| SEM                          | 91    | 98    | 106   | 100   | 83     | 101     | 77    | 78       | 73           |
| <i>2AFC video session</i>    |       |       |       |       |        |         |       |          |              |
| mean accuracy                | 0.986 | 1.000 | 1.000 | 1.000 | 0.924  | 0.972   | 0.993 | 1.000    | 0.875        |
| SEM                          | 0.009 | 0.000 | 0.000 | 0.000 | 0.024  | 0.012   | 0.007 | 0.000    | 0.035        |
| mean RT                      | 1923  | 1903  | 1819  | 1821  | 1753   | 1689    | 1670  | 1657     | 1897         |
| SEM                          | 66    | 69    | 71    | 67    | 93     | 90      | 85    | 80       | 70           |
| <i>unusualness sentences</i> |       |       |       |       |        |         |       |          |              |
| mean rating                  | 1.09  | 1.36  | 1.18  | 1.09  | 2.09   | 1.18    | 1.27  | 1.45     | NA           |
| SEM                          | 0.09  | 0.28  | 0.12  | 0.09  | 0.37   | 0.12    | 0.19  | 0.25     | NA           |
| <i>unusualness videos</i>    |       |       |       |       |        |         |       |          |              |
| mean rating                  | 1.18  | 1.00  | 1.36  | 1.36  | 2.18   | 1.45    | 1.91  | 2.00     | NA           |
| SEM                          | 0.12  | 0.00  | 0.20  | 0.28  | 0.44   | 0.28    | 0.31  | 0.36     | NA           |
| <i>Person-directedness</i>   |       |       |       |       |        |         |       |          |              |
| mean rating                  | 1.15  | 1.25  | 4.20  | 3.40  | 1.20   | 1.15    | 5.50  | 5.65     | NA           |
| SEM                          | 0.08  | 0.12  | 0.39  | 0.41  | 0.12   | 0.11    | 0.24  | 0.17     | NA           |
| <i>Object-directedness</i>   |       |       |       |       |        |         |       |          |              |
| mean rating                  | 5.80  | 5.80  | 5.65  | 5.75  | 1.65   | 1.70    | 1.15  | 1.15     | NA           |
| SEM                          | 0.09  | 0.12  | 0.17  | 0.12  | 0.32   | 0.35    | 0.11  | 0.11     | NA           |

**Supplementary Table 2.** One-tailed t-tests and Bayesian comparisons for within-video, within-sentence, and crossmodal decoding.

|      | within-video  |          |           | within-sentence |          |           | crossmodal    |          |           |
|------|---------------|----------|-----------|-----------------|----------|-----------|---------------|----------|-----------|
|      | <i>t</i> (20) | <i>p</i> | <i>BF</i> | <i>t</i> (20)   | <i>p</i> | <i>BF</i> | <i>t</i> (20) | <i>p</i> | <i>BF</i> |
| LPTC | 11.18         | <0.0001  | >1000     | 5.10            | <0.0001  | 953.27    | 4.17          | 0.0002   | 138.61    |
| IPS  | 8.56          | <0.0001  | >1000     | 5.64            | <0.0001  | >1000     | -1.20         | 0.8773   | 0.11      |
| PMC  | 7.33          | <0.0001  | >1000     | 2.78            | 0.0058   | 8.88      | -0.85         | 0.7984   | 0.13      |
| IFG  | 5.55          | <0.0001  | >1000     | 3.91            | 0.0004   | 81.31     | -0.08         | 0.5314   | 0.21      |

### Supplementary References

1. Jeffreys H. *The theory of probability*. OUP Oxford (1998).
2. Bracci S, Caramazza A, Peelen MV. Representational Similarity of Body Parts in Human Occipitotemporal Cortex. *J Neurosci* **35**, 12977-12985 (2015).
3. Bracci S, Cavina-Pratesi C, Ietswaart M, Caramazza A, Peelen MV. Closely overlapping responses to tools and hands in left lateral occipitotemporal cortex. *J Neurophysiol* **107**, 1443-1456 (2012).
4. Bracci S, Peelen MV. Body and object effectors: the organization of object representations in high-level visual cortex reflects body-object interactions. *J Neurosci* **33**, 18247-18258 (2013).
5. Fairhall SL, Caramazza A. Brain regions that represent amodal conceptual knowledge. *J Neurosci* **33**, 10552-10558 (2013).
6. Simanova I, Hagoort P, Oostenveld R, van Gerven MA. Modality-independent decoding of semantic information from the human brain. *Cereb Cortex* **24**, 426-434 (2014).
